# Supplementary material for: Examining implicit procedural learning in tetraplegia using an oculomotor serial reaction time task
Source: PLoS One. 2020 Apr 23;15(4):e0232124. doi: 10.1371/journal.pone.0232124 (PMC7179886; doi:10.1371/journal.pone.0232124)
Supplement: S1 Dataset — (XLSX) [file pone.0232124.s001.xlsx]

## Sheet: Data
Subject_ID	Matching ID (same numbers matched)	Group (1SCI_2CG)	Sex (1F_0M)	Age	Education (years)	RT_Block_1	RT_Block_2	RT_Block_3	RT_Block_4	RT_Block_5	RT_Block_6	RT_Block_7	RT_Block_8	ant1	ant2	ant3	ant4	ant5	ant6	ant7	ant8	Vocabulary	Matrix	Digit_span	QIDS_SR	SRT_aware_answers
1	8	1	1	48	13	155.5	157.59	161.98	151.77	112.71	58.74	96.24	171.29	62.11	61.35	53.32	54.85	53.67	55.24	57.22	56.48	10	12	10	5	1
2	5	1	0	62	12	183.52	199.37	172.29	132.81	106.26	167.91	115.08	209.06	39.44	53.13	28.57	51.49	49.77	48.88	54.39	43.77	12	15	11	2	1
3	7	1	0	54	17	218.82	102.14	151.31	63.11	82.52	173.97	117.38	87.21	44.21	50.22	51.79	55.1	58.16	54.49	54.44	59.29	14	12	12	3	1
4	9	1	0	61	9	189.07	173.27	139.83	211.93	151.18	131.11	194.26	214.37	48.41	47.37	48.96	40.53	46.06	54.48	46.98	42.33	12	12	11	3	0
5	2	1	0	52	17	351.33	158.42	77.58	128.59	58.05	59.01	139.49	62.12	37.5	37.95	57.69	48.35	62.57	56.99	47.12	68.72	11	15	13	3	2
6	10	1	0	26	16	133.37	165.61	125.68	47.71	52.17	76.87	162.32	44.01	52.05	38.79	58.47	53.28	52.86	52.95	42.85	55.82	15	17	10	3	2
7	6	1	0	57	19	21.94	64.81	97.51	32.87	56.36	44.42	178.83	58.04	55.03	50.93	56.52	64.92	66.13	55.4	41.99	59.27	16	15	10	1	0
8	1	1	0	25	12	147.79	172.33	129.82	70.62	115.31	77.87	164.77	152.31	43.11	38.58	52.84	55.61	50.22	53.04	46.53	50.5	12	11	9	3	1
9	3	1	0	31	15	183.44	92.14	104.9	18.85	25.41	46.61	136.17	40.9	42.31	50.61	57.88	57.02	57.57	58.5	51.84	64.78	12	12	16	5	0
10	4	1	0	39	11	197.41	184.76	210.47	175.87	182.72	171.84	176.48	125.09	37.87	39.23	38.94	45.54	36.64	47.69	35.39	51.28	13	12	14	3	0
11	12	1	0	39	16	157.64	174.97	201.18	168.13	120.07	158.15	203.48	159.44	51.85	48.33	44.68	43.96	52.14	51.4	39.96	43.74	15	16	11	1	0
12	11	1	0	25	12	160.77	201.55	117.83	81.14	125.09	82.19	221.39	124.94	46.21	42.21	50.7	57.35	53.57	57.37	31.15	47.89	10	14	7	6	0
13	1	2	0	24	12	205.52	197.02	168.27	170.38	146.54	84.67	166.42	89.96	42.2	34.57	43.07	53.38	45.32	54.96	53.85	56.25	16	14	12	3	2
14	2	2	0	51	18	162.71	101.46	147.26	82.49	61.63	143.03	167.92	78.49	36.32	51.41	45.97	45.47	58.01	48.01	48.15	49.29	11	14	13	3	2
15	3	2	0	31	16	127.69	125.99	60.28	70.18	20.93	28.64	82.89	65.66	44.78	49.14	60.88	58.42	57.91	64.29	52.86	60.52	12	11	16	10	0
16	4	2	0	38	16	147.36	183.89	139.6	93.68	90.92	25.93	75.17	84.59	43.68	43.87	48.49	49.4	51.43	57.63	60.02	52.57	14	15	12	8	1
17	5	2	0	60	12	146.01	37.36	23.23	5.01	21.87	52.69	177.24	24.93	47.63	67.96	73.43	85.66	86.17	86.73	40.26	88.8	12	13	12	6	1
18	6	2	0	62	15	147.28	132.57	75.36	124.19	42.24	105.89	52.02	63.92	41.4	45.62	53.45	49.58	56.92	51.09	62.04	53.87	15	15	12	3	1
19	7	2	0	53	18	108.21	120.66	99.15	101.27	38.36	87.8	85.49	55.8	53.49	52.15	54.98	53.79	60.1	63.64	55.81	59.15	13	15	11	1	2
20	8	2	1	47	12	166.52	118.25	112.48	22.47	147.52	77.87	176.32	164.86	48.48	49.01	60.29	63.51	45.66	61.71	39.48	64.49	12	18	13	8	0
21	9	2	0	60	12	164.28	151.49	128.48	115.19	142.07	167.86	205.14	86.72	48.64	46.55	47.21	47.62	52.56	49.94	35.74	57.64	12	14	10	10	1
22	10	2	0	27	15	165.92	148.23	159.19	107.79	89.19	127.94	207.42	111.94	47.76	45.77	46.82	53.03	54.78	53.3	37.57	52.27	14	17	10	8	0
23	11	2	0	26	12	166.07	149.73	123.77	127.84	146.28	75.84	150.11	110.54	49.3	50.52	53.74	59.21	55.37	58.84	54.55	54.04	10	12	8	8	0
24	12	2	0	40	15	213.81	177.68	138.43	194.96	191.91	140.81	151.22	158.81	32.73	45.78	43.2	48.22	43.48	53.84	50.72	48.26	16	15	11	0	0

## Sheet: Legend
Variable	Explanation
Subject ID	Original subject numbers
Matching ID	Indication of between-group matching. Participants with the same Matching ID were matched for age, sex, and education.
Group (1SCI_2CG)	Group - 1 = Spinal Cord Injury, 2 = Control Group
Sex (1F_0M)	Sex - 1 = Female, 0 = Male
Age	Participant age at time of data collection
Education (years)	Years of education
RT_Block1-8	(eight separate variables) Reaction time for each O-SRT block
ant1-8	(eight separate variables) Anticipation score for each O-SRT block
Vocabulary	WAIS-III Vocabularly subtest score
Matrix	WAIS-III Matrix subtest score
Digit_span	WAIS-III Digit Span subtest score
QIDS_SR	Quick Inventory of Depressive Symptomatology Self-Report (QIDS-SR) score
SRT_aware_answers	Awareness task score
